# Supplementary material for: Essential Oils Extracted from Boswellia sacra Oleo Gum Resin Loaded into PLGA–PCL Nanoparticles: Enhanced Cytotoxic and Apoptotic Effects against Breast Cancer Cells
Source: PubMed Central journal article supplement — ACS Omega. 2022 Dec 19;8(1):1017–25. doi: 10.1021/acsomega.2c06390 (PMC9835537; doi:10.1021/acsomega.2c06390), 2022-12-19
Supplement: ao2c06390_si_001.pdf [file ao2c06390_si_001.pdf]

## Supporting Information

### Essential Oils Extracted from *Boswellia sacra* Oleo Gum Resin Loaded into PLGA-PCL Nanoparticles: Enhanced Cytotoxic and Apoptotic Effects against Breast Cancer Cells

Hassan Mohamed El-Said Azzazy<sup>1,2\*</sup>, Anwar Abdelnaser<sup>3</sup>, Hadeer Al Mulla<sup>1</sup>, Amany M. Sawy<sup>1</sup>, Samir N. Shamma<sup>3</sup>, Mahmoud Elhusseiny<sup>3</sup>, Salim Alwahibi<sup>4</sup>, Noha Khalil Mahdy<sup>1</sup>, Sherif Ashraf Fahmy<sup>1,5\*</sup>

<sup>1</sup>Department of Chemistry, School of Sciences & Engineering, The American University in Cairo, AUC Avenue, P.O. Box 74, New Cairo 11835, Egypt. noha.khalil@aucegypt.edu (N.K.M); [hadeer.almulla@aucegypt.edu](mailto:hadeer.almulla@aucegypt.edu) (H.A.M),

<sup>2</sup>Department of Nanobiophotonics, Leibniz Institute for Photonic Technology, Jena 07745, Germany

<sup>3</sup> Institute of Global Health and Human Ecology, School of Sciences & Engineering, The American University in Cairo, AUC Avenue, P.O. Box 74, New Cairo 11835, Egypt. [anwar.abdelnaser@aucegypt.edu](mailto:anwar.abdelnaser@aucegypt.edu)

<sup>4</sup> Falha Medical Solutions, Muscat, Oman, [dr.salim@sehatek.com](mailto:dr.salim@sehatek.com)

<sup>5</sup>School of Life and Medical Sciences, University of Hertfordshire Hosted by Global Academic Foundation, R5 New Garden City, New Administrative Capital, AL109AB, Cairo 11835, Egypt

\* **Correspondence:** [hazzazy@aucegypt.edu](mailto:hazzazy@aucegypt.edu); **(H.M.E.A)** Tel.: +2 02 2615 2559;

[sheriffahmy@aucegypt.edu](mailto:sheriffahmy@aucegypt.edu) **(S.A.F)**; Tel.: +201222613344.

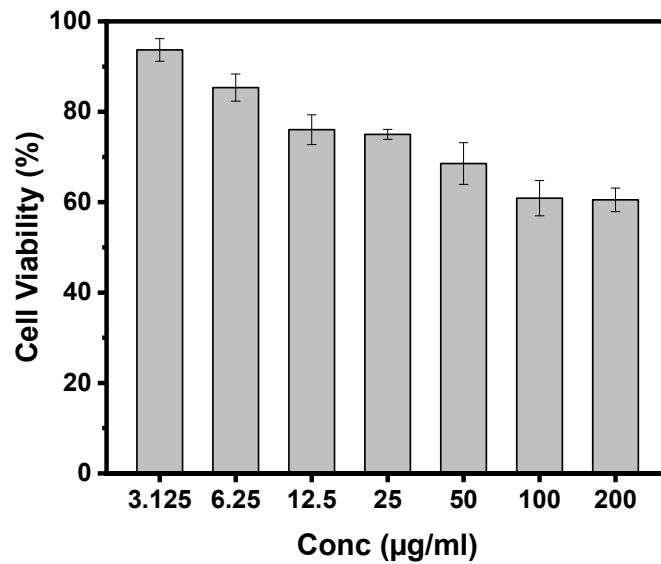

**Figure S1.** Cell viability of MCF-7 cells after treatment with PLGA-PCL NPs for 24 h.
